# Supplementary material
Source: HighWire-hosted journal article supplement (https://bmjopen.bmj.com/content/15/4/e088271)
Supplement: inline-supplementary-material-2 [file inline-supplementary-material-2.pdf]

Table 1: Apple Watch Continuous Monitoring Data

| Variable                       | Data recorded                                                                                                                                                                                                                                                                                                                                                                                                                                                                                                                                                                                                                                                                    |
|--------------------------------|----------------------------------------------------------------------------------------------------------------------------------------------------------------------------------------------------------------------------------------------------------------------------------------------------------------------------------------------------------------------------------------------------------------------------------------------------------------------------------------------------------------------------------------------------------------------------------------------------------------------------------------------------------------------------------|
| Heart Rate (HR) (BPM)          | <p><u>Heart Rate</u> (Beats Per Minute): Apple watch records HR approximately every 5 minutes.</p> <p><u>Resting Heart Rate</u>: The average heart beats per minute measured when the wearer has been inactive or relaxed for several minutes.</p> <p><u>Heart Rate Variability</u>: A measure of the variation in the time interval between beats. Apple watch calculates HRV by using standard deviation of beat-to-beat measurements which are captured by the heart rate sensor. Average HRV per day is recorded.</p> <p><u>Walking Heart Rate Average</u>: the average heart beats per minute measured by Apple Watch during walks at a steady pace throughout the day.</p> |
| Respiratory Rate (breaths/min) | Apple watch records Respiratory Rate while the wearer is sleeping                                                                                                                                                                                                                                                                                                                                                                                                                                                                                                                                                                                                                |
| Blood Oxygen (SpO2)            | Apple watch attempts to record oxygen saturation every 30 minutes during sleep. It will also opportunistically record oxygen saturation during the day while arm is at rest. Also, a participant can opt to do a recording themselves at their convenience.                                                                                                                                                                                                                                                                                                                                                                                                                      |
| Six-Minute Walk estimate       | A weekly estimate of how far the wearer can walk on flat ground in six minutes based on recent motion and workout data. The Apple Watch can give a predicted six-minute walk distance up to 500 meters.                                                                                                                                                                                                                                                                                                                                                                                                                                                                          |
| Step Count (count)             | Step count is the number of steps you take throughout the day.                                                                                                                                                                                                                                                                                                                                                                                                                                                                                                                                                                                                                   |
| Distance Walking Running (km)  | Calculates an average distance you have walked and run over the last 7 days                                                                                                                                                                                                                                                                                                                                                                                                                                                                                                                                                                                                      |
| Exercise minutes               | Measure of how many minutes of brisk activity you do                                                                                                                                                                                                                                                                                                                                                                                                                                                                                                                                                                                                                             |
| Sleep analysis                 | Time In Bed<br>Time Asleep (Core, Deep, REM)<br>Time Awake                                                                                                                                                                                                                                                                                                                                                                                                                                                                                                                                                                                                                       |
| Wrist Temperature              | Wrist temperature is a measurement related to your body's temperature taken by Apple Watch while you are sleeping. Each value is an average of several measurements taken during sleep.                                                                                                                                                                                                                                                                                                                                                                                                                                                                                          |
